# Supplementary material for: Pt(iv) derivatives of cisplatin and oxaliplatin bearing an EMT-related TMEM16A/COX-2-selective dual inhibitor against colorectal cancer cells HCT116
Source: Royal Society of Chemistry journal article supplement (doi:10.1039/d4md00327f), 2024-01-01
Supplement: d4md00327f1.pdf [file d4md00327f1.pdf]

## Electronic Supporting Information

For

### **Pt(IV) derivatives of cisplatin and oxaliplatin bearing EMT-related TMEM16A/COX-2-selective dual inhibitor against colorectal cancer cells HCT116**

Zhong-Ying Ma,<sup>‡a</sup> Xiao-Jing Ding,<sup>‡a</sup> Zhen-Zhen Zhu,<sup>a</sup> Qian Chen,<sup>a</sup> Dong-Bo Wang,<sup>a</sup>

Xin Qiao<sup>a</sup> and Jing-Yuan Xu<sup>\*ab</sup>

*<sup>a</sup>Department of Chemical Biology and Tianjin Key Laboratory of Technologies Enabling Development of Clinical Therapeutics and Diagnostics (Theranostics), School of Pharmacy, Tianjin Medical University, Tianjin 300070, China.*

*<sup>b</sup>Key Laboratory of Immune Microenvironment and Disease of the Ministry of Education, Tianjin Medical University, Tianjin, 300070, China.*

<sup>‡</sup>The first two authors contributed equally to this work.

\*Corresponding author: Prof. Jing-Yuan Xu

*E-mail address:* xujingyuan@tmu.edu.cn (Prof. J.-Y. Xu)

## **The List of Content:**

### **Experimental Details.**

Cell lines and cell culture

Cytotoxicity activity

Drug accumulation

Intracellular drug release

Cell cycle analysis

Apoptosis analysis

Immunofluorescence assay

Wound healing assay

Cell adhesion assay

Western blot analysis

### **Figure Captions.**

**Fig. S1** HPLC characterization of **1**

**Fig. S2** HPLC characterization of **2**

**Fig. S3**  $^1\text{H-NMR}$  spectrum of **1** in  $\text{DMSO-}d_6$

**Fig. S4**  $^{13}\text{C-NMR}$  spectrum of **1** in  $\text{DMSO-}d_6$

**Fig. S5** HR-MS spectrum of **1**

**Fig. S6**  $^1\text{H-NMR}$  spectrum of **2** in  $\text{DMSO-}d_6$

**Fig. S7**  $^{13}\text{C-NMR}$  spectrum of **2** in  $\text{DMSO-}d_6$

**Fig. S8** HR-MS spectrum of **2**

**Fig. S9** Original images of the bands in western blot analysis

**Fig. S10** Statistical analysis of the expression of  $\gamma\text{H2AX}$  in HCT116 cells after treatment with varied compounds for 6 h. \* $P < 0.05$ , \*\* $P < 0.01$ , \*\*\* $P < 0.001$ , compared with control group.

**Fig. S11** Statistical analysis of the apoptosis in HCT116 cells after treatment with varied compounds for 48 h. \* $P < 0.05$ , \*\* $P < 0.01$ , \*\*\* $P < 0.001$ , compared with control group.

**Fig. S12** Wound healing assay. HCT116 cells were treated with varied compound at equitoxic concentration ( $IC_{50}$  value) for 48 h. \* $P < 0.05$ , compared with control group.

#### *Cell culture*

The cells were maintained in either DMEM medium (A549, HeLa, MCF-7, and HUVEC), or RPMI1640 medium (HCT116) containing 10% FBS in a humidified atmosphere containing 5%  $CO_2$  at 37 °C.

#### *Cytotoxicity activity*

Varied kinds of cells were seeded in 96-well microplates and incubated for 24 h, and then treated with graded amount of compounds, respectively. After 48 h, 10  $\mu$ L MTT solution was added to each well, and incubated at 37 °C for an additional 4 h. Then, the supernatant was removed from each plate and 100  $\mu$ L DMSO was added to dissolve the MTT formazan crystals. The absorbance was measured at 570 nm by an enzyme-linked immunosorbent assay (ELISA) reader.

#### *Drug accumulation*

In brief,  $1 \times 10^6$  HCT116 cells were seeded in 6-well plates at 37 °C under 5%  $CO_2$  and incubated overnight. The cells were incubated with oxaliplatin (10  $\mu$ M), oxaPt(IV) (10  $\mu$ M), complex **2** (10  $\mu$ M), and mixture (oxaPt(IV) : NFA = 10  $\mu$ M : 20  $\mu$ M) for 3, 6, and 9 h, respectively. The medium was removed, and the cells was washed with ice-cold PBS, collected and centrifuged at 1500 rpm for 3 min. Then, the samples were lyophilized by a freeze dry system. Prior to analysis,  $HNO_3$  was employed to digest the lyophilized cells. Eventually, ICP-MS was used to quantify the platinum content via three parallel experiments.

#### *Intracellular drug release*

$1.5 \times 10^7$  HCT116 cells/well were cultured in 6-well plates, and then treated with 100

$\mu\text{M}$  complex **2** for 4 or 10 h. The untreated cells serving as a control group. Then, the cells were washed with ice-cold PBS for three times and collected by centrifugation. The cells were re-suspended in a mixture of dichloromethane and methanol (1:1) for mechanical grinding, and centrifuged at 12000 rpm for 5 min to collect the supernatant. The supernatant was dried under  $\text{N}_2$  flow, then dissolved in methanol, and ultimately analyzed by HPLC.

#### *Cell cycle analysis*

HCT116 cells were transferred into 6-well plates at the density of  $1 \times 10^6$  cells  $\text{mL}^{-1}$  overnight at  $37^\circ\text{C}$ , and then treated with complex **2** (10  $\mu\text{M}$ ), oxaliplatin (10  $\mu\text{M}$ ), oxaPt(IV) (10  $\mu\text{M}$ ), mixture (oxaPt(IV) : NFA = 10  $\mu\text{M}$  : 20  $\mu\text{M}$ ), and NFA (20  $\mu\text{M}$ ) for 24 h. All cells, including floating and adherent cells, were harvested and rinsed twice with PBS and then fixed the pellets with 250  $\mu\text{L}$  70% cold ethanol at  $-20^\circ\text{C}$  over 24 h. Fixed cells were centrifuged to remove the ethanol and washed once with PBS. The cells were re-suspended by 250  $\mu\text{L}$  PBS and added 2.5  $\mu\text{L}$  RNase A at  $37^\circ\text{C}$  to avoid RNA interference. After 0.5 h, the cells were stained with 50  $\mu\text{g}/\text{mL}$  propidium iodide (PI) solution in the dark at  $37^\circ\text{C}$  for another 0.5 h. Finally, the cell cycle distribution was measured immediately by a flow cytometer (BD FACS Verse). The data was carried out with ModFit 3.1 software.

#### *Apoptosis analysis*

HCT116 were incubated in 6-well plates at the density of  $1 \times 10^6$  cells  $\text{well}^{-1}$  for 24 h to attach. Then, the cells were induced apoptosis induced by complex **2** (10  $\mu\text{M}$ ), oxaliplatin (10  $\mu\text{M}$ ), oxaPt(IV) (10  $\mu\text{M}$ ), mixture (oxaPt(IV) : NFA = 10  $\mu\text{M}$  : 20  $\mu\text{M}$ ), and NFA (20  $\mu\text{M}$ ) for 48 h. Next, the cells were washed twice with PBS, digested with non-EDTA trypsinase, and collected by centrifugation. Cells were stained according to the instruction of AnnexinV-FITC Apoptosis Detection Kit (Solarbio), and detected using a flow cytometer (BD FACS Verse).

#### *Immunofluorescence assay*

After addition of complex **2** (10  $\mu\text{M}$ ), oxaliplatin (10  $\mu\text{M}$ ), oxaPt(IV) (10  $\mu\text{M}$ ), mixture (oxaPt(IV) : NFA = 10  $\mu\text{M}$  : 20  $\mu\text{M}$ ), and NFA (20  $\mu\text{M}$ ) for 6 h, HCT116 cells were

fixed by 70% ethyl alcohol for 12 h. Then, cells were blocked in 0.5% albumin bovine V solution for 2 h. The rabbit polyclonal COX-2 were added, cells were co-incubated at 4 °C overnight. The 15 mm glass bottom cell culture dishes were washed and stained with Alexa Fluor 488-conjugated Goat Anti-Rabbit IgG(H+L) antibody for 2 h. After washed with PBS, the cells were mounted with DAPI for nucleus staining. The results were captured using a confocal laser scanning microscope (Olympus FV1000).

#### *Wound healing assay*

$2 \times 10^6$  HCT116 cells/well were seeded in 6-well plates, grown to form confluent monolayers. Then the cells were wounded with 200  $\mu$ L plastic pipette tips and washed with PBS. Cells were treated with complex **2** (5  $\mu$ M), oxaliplatin (5  $\mu$ M), oxaPt(IV) (5  $\mu$ M), mixture (oxaPt(IV) : NFA = 5  $\mu$ M : 10  $\mu$ M) and NFA (10  $\mu$ M), or varied compound at equitoxic concentration ( $IC_{50}$  value) for 48 h. The closure of wound was measured by the Motic AE2000 microscope and photographed with Mtico Images Advanced 3.2.

#### *Cell adhesion assay*

$3 \times 10^3$  HCT116 cells/well were seeded into a matrigel-coated 96-well plate after 24 h treatments with complex **2** (5  $\mu$ M), oxaliplatin (5  $\mu$ M), oxaPt(IV) (5  $\mu$ M), mixture (oxaPt(IV) : NFA = 5  $\mu$ M : 10  $\mu$ M), and NFA (10  $\mu$ M), respectively. 24 h later, each well was washed twice by PBS. The plate was fixed in 4% paraformaldehyde and then stained with 1% crystal violet. After washed, the images were performed using an inverted microscope (Leica DMI3000B). And MTT (5 mg mL<sup>-1</sup>) in 1640 medium was added into the other plate and the attached cells were incubated at 37 °C for 4 h. Then, supernatant was removed and 100  $\mu$ L DMSO was added to each well, and shaken for 10 min. The following processes were same as the measurement of cell viability.

#### *Western blot analysis*

HCT116 cells were seeded in 6-well plates and incubated until 90% confluent. The cells were exposed to complex **2** (10  $\mu$ M), oxaliplatin (10  $\mu$ M), oxaPt(IV) (10  $\mu$ M), mixture (oxaPt(IV) : NFA = 10  $\mu$ M : 20  $\mu$ M), and NFA (20  $\mu$ M) for 24 h. After treatments, the cells were harvested and washed twice with PBS. A solution of 200  $\mu$ L RIPA buffer was added to each one. After 30 min, the cells were harvested and used as protein

extracts. After protein quantification, aliquots of 40  $\mu\text{g}$  of proteins were denatured and departed in 10% SDS-PAGE. Then gels were transferred onto PVDF membrane. After blocking with 5% non-fat milk in tris-buffered saline–tween solution (TBST) for 4 h, the membrane was incubated overnight with primary polyclonal antibody at 1:2000 at 4 °C. After washing, the bands were added and incubated with secondary antibody conjugated to horseradish peroxidase (1:5000) for 1.5 h at room temperature. Finally, the bands were detected with Thermo Scientific Pierce ECL Western Blotting Substrate.

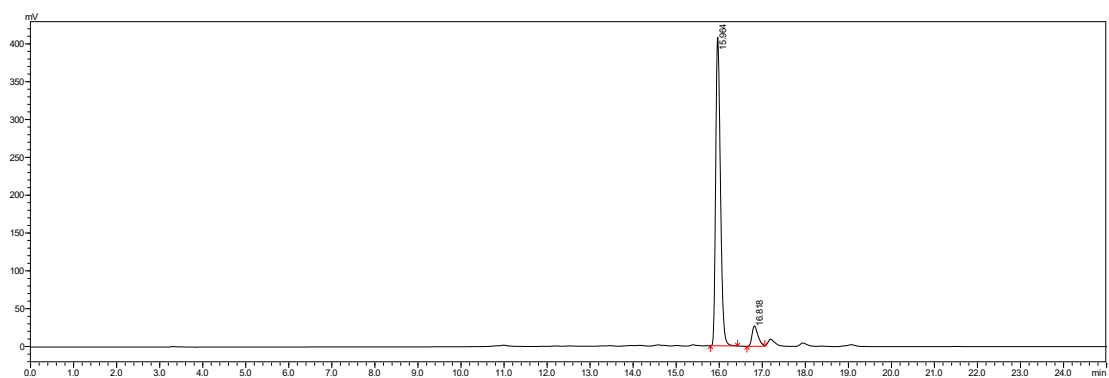

**Fig. S1** HPLC characterization of **1**

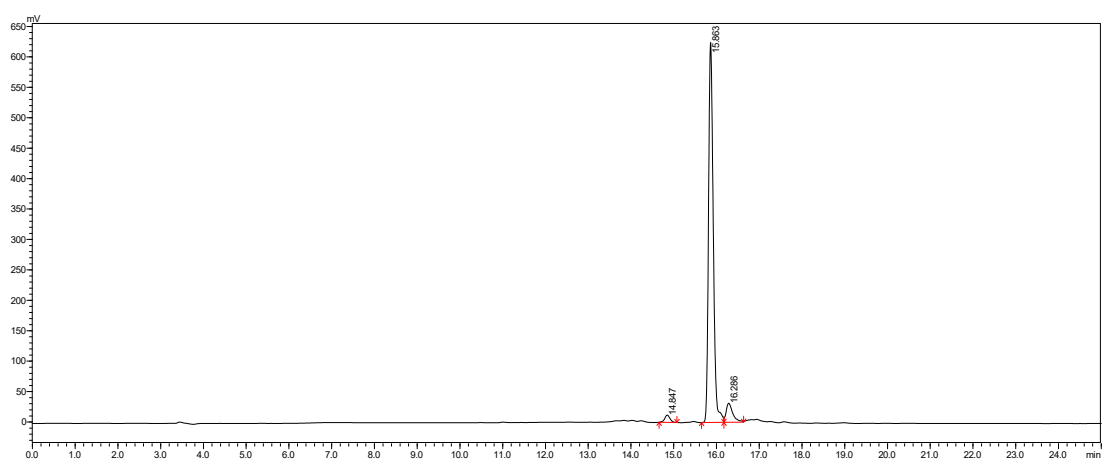

**Fig. S2** HPLC characterization of **2**

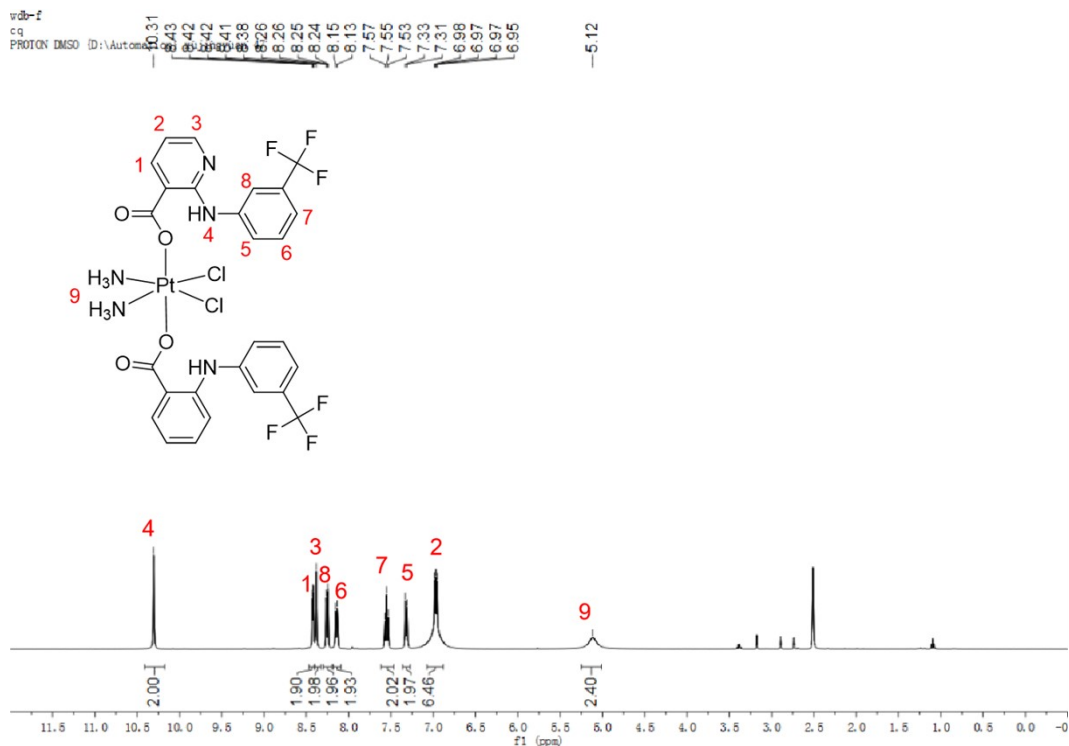

**Fig. S3**  $^1\text{H}$  NMR spectrum of **1** in  $\text{DMSO-}d_6$

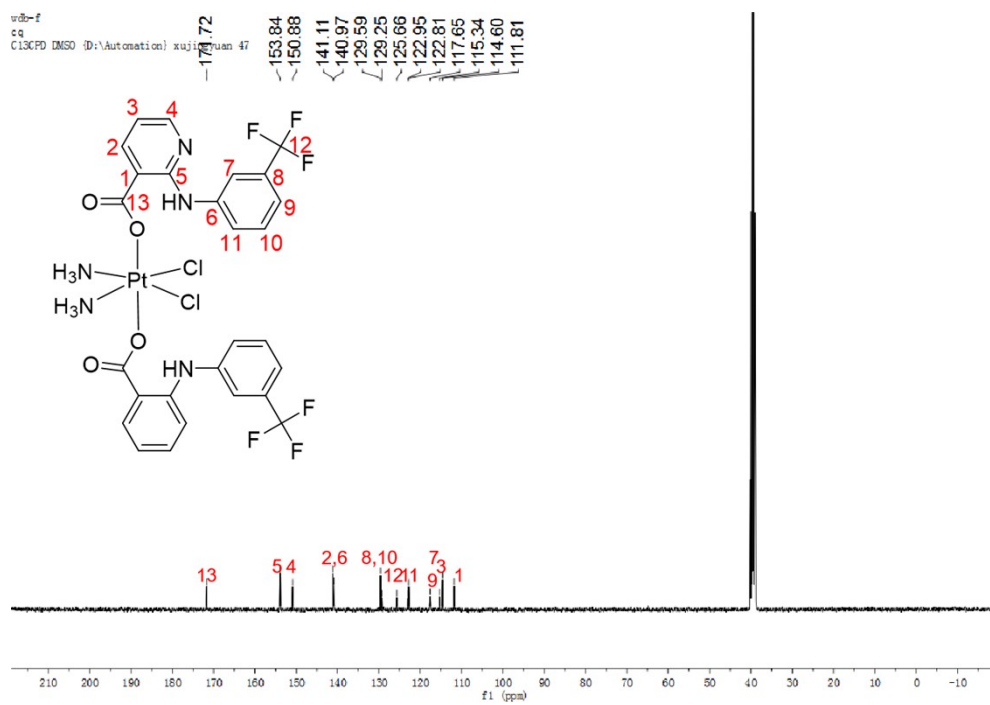

**Fig. S4**  $^{13}\text{C}$  NMR spectrum of **1** in  $\text{DMSO-}d_6$

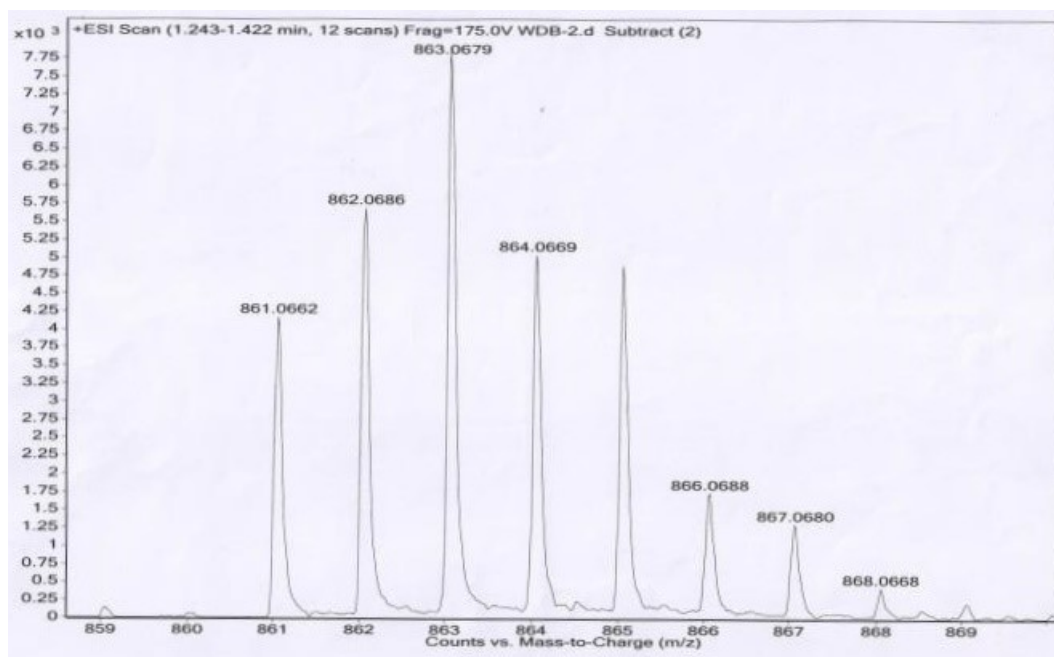

Fig. S5 ESI-HRMS spectrum of **1**

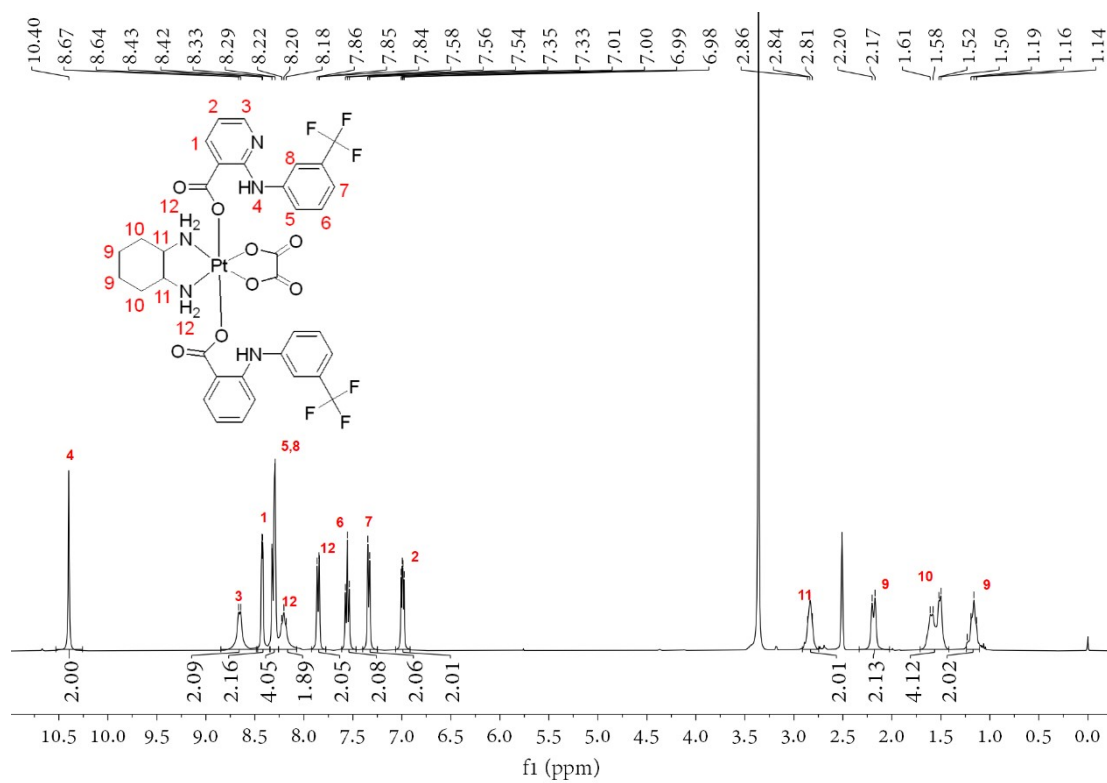

Fig. S6 <sup>1</sup>H NMR spectrum of **2** in DMSO-*d*<sub>6</sub>



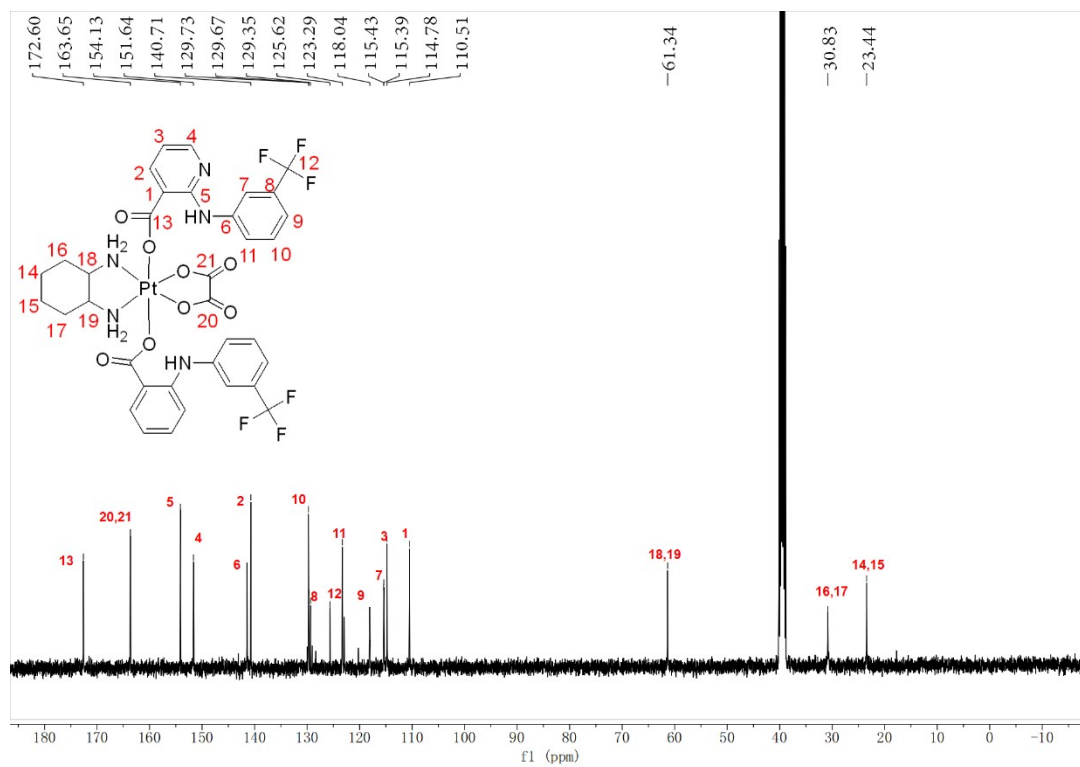

Fig. S7  $^{13}\text{C}$  NMR spectrum of 2 in DMSO- $d_6$

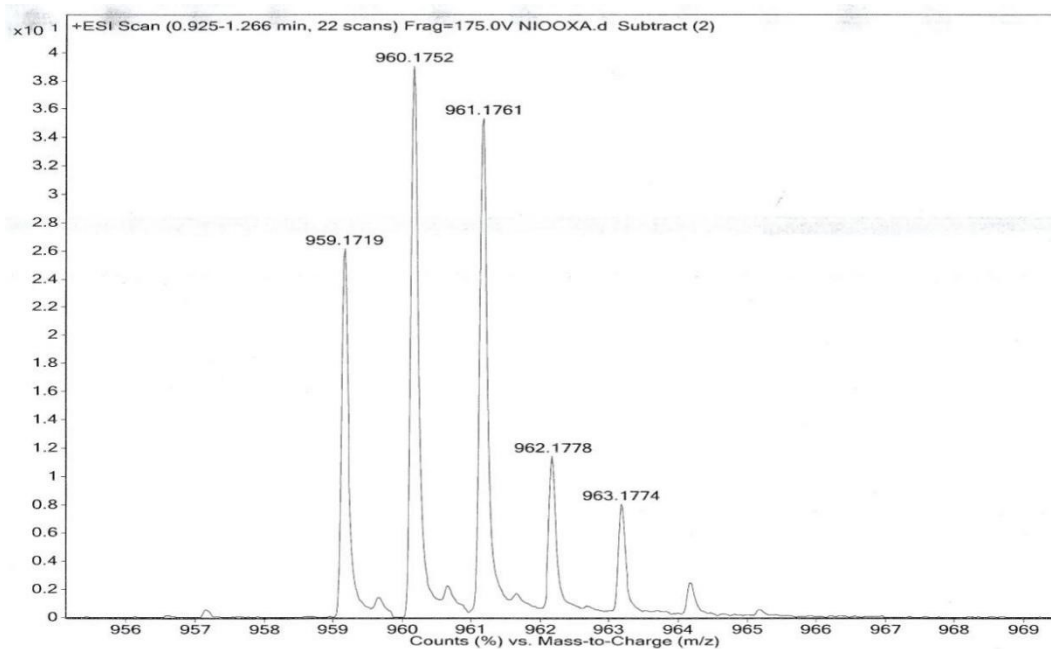

Fig. S8 HR-MS spectrum of 2

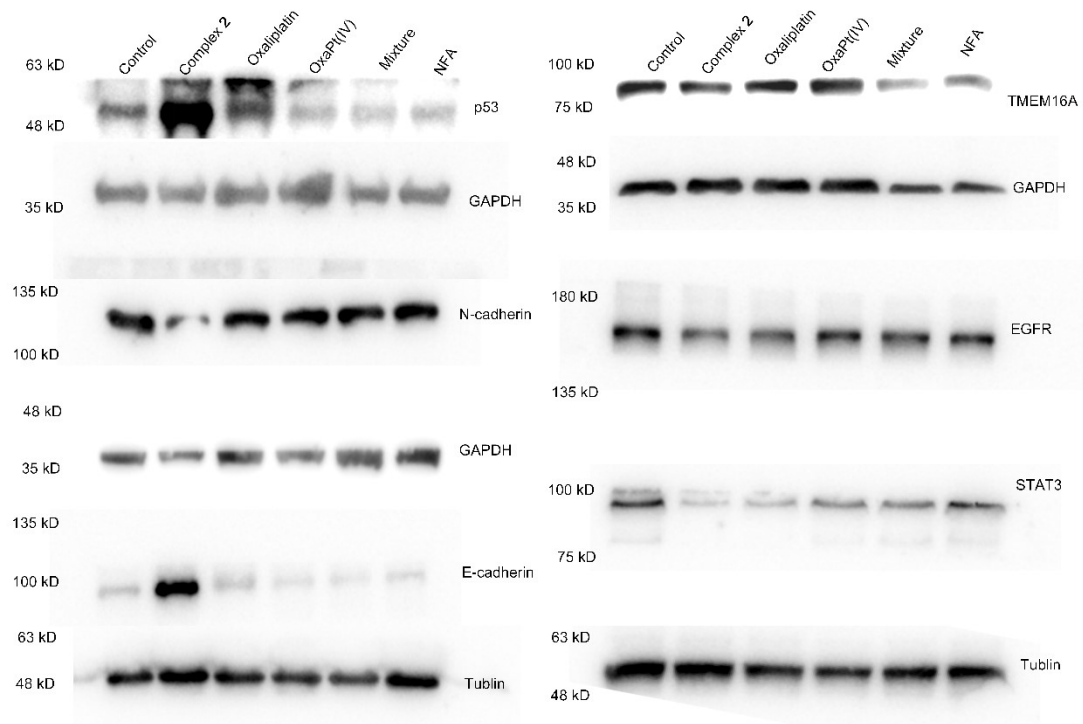

**Fig. S9** Original images of the bands in western blot analysis

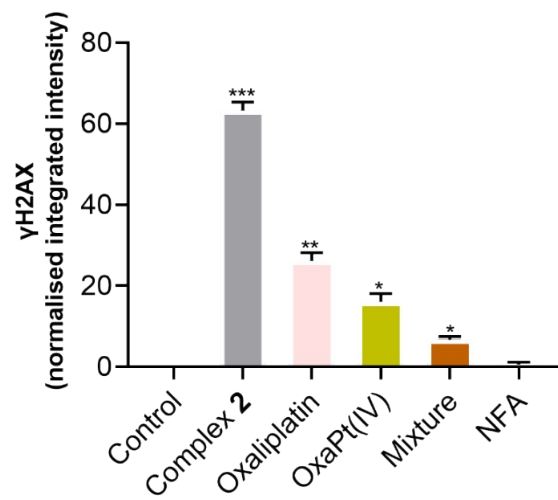

**Fig. S10** Statistical analysis of the expression of  $\gamma$ H2AX in HCT116 cells after treatment with varied compounds for 6 h. \*P < 0.05, \*\*P < 0.01, \*\*\*P < 0.001, compared with control group.

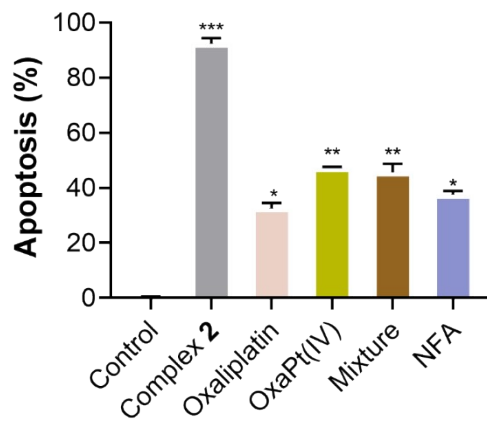

**Fig. S11** Statistical analysis of the apoptosis in HCT116 cells after treatment with varied compounds for 48 h. \* $P < 0.05$ , \*\* $P < 0.01$ , \*\*\* $P < 0.001$ , compared with control group.

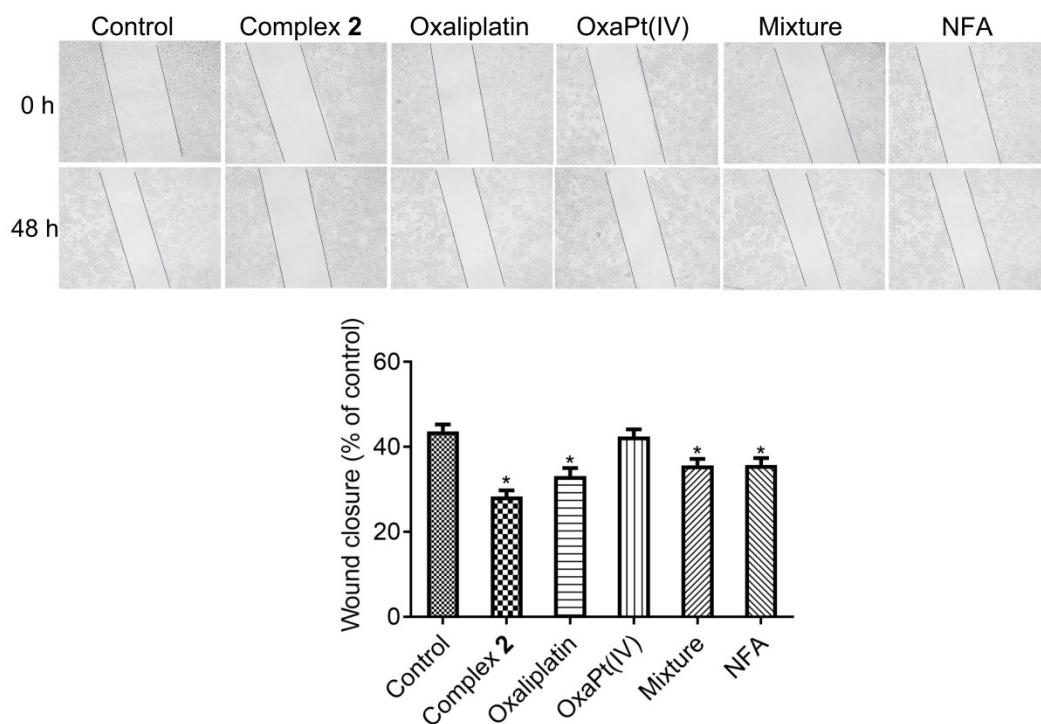

**Fig. S12** Wound healing assay. HCT116 cells were treated with varied compounds at equitoxic concentration ( $IC_{50}$  value) for 48 h. \* $P < 0.05$ , compared with control group.
